# Supplementary material
Source: ML conference proceedings conference paper supplement (https://proceedings.neurips.cc/paper_files/paper/2021/hash/21e4ef94f2a6b23597efabaec584b504-Abstract.html)
Supplement: Supplementary file 1 [file 21e4ef94f2a6b23597efabaec584b504-Supplemental.zip]

Archive with 8 entries (7 files):
- supplementary/
- __MACOSX/._supplementary
- supplementary/.DS_Store
- __MACOSX/supplementary/._.DS_Store
- supplementary/Appendix.pdf
- __MACOSX/supplementary/._Appendix.pdf
- supplementary/code.zip
- __MACOSX/supplementary/._code.zip
